# Supplementary material for: Controlled synthesis of amphiphilic graft copolymer for superhydrophobic electrospun fibres with effective surface fluorine enrichment: the role of electric field and solvent
Source: Royal Society of Chemistry journal article supplement (doi:10.1039/c5ra15317d), 2015-01-01
Supplement: c5ra15317d1.pdf [file c5ra15317d1.pdf]

## Supporting Information

Controlled synthesis of amphiphilic graft copolymer for superhydrophobic electrospun fibres with effective surface fluorine enrichment: the role of electric field and solvent

*Yudi Guo<sup>a,b</sup>, Dongyan Tang<sup>a\*</sup>, Erqing Zhao<sup>c</sup>, Zaiqian Yu<sup>a</sup>, Haitao Lv<sup>a</sup>, Xinyu Li<sup>a</sup>*

<sup>a</sup> Department of Chemistry, School of Science, Harbin Institute of Technology, Harbin 150001, China

<sup>b</sup> Key Laboratory of Marine Environmental Corrosion and Bio-fouling, Institute of Oceanology, Chinese Academy of Sciences, Qingdao 266071, China

<sup>c</sup> Qingdao Institute of Bioenergy and Bioprocess Technology, Chinese Academy of Sciences, Qingdao 266101, China

\*Corresponding author: Prof. Dongyan Tang

E-mail: dytang@hit.edu.cn

### Contents

1. Fig. S1 GPC traces of PMMA-*r*-PHPA, PMMA-*r*-PHPA-Br and PMMA-*r*-PHPA-*g*-PDFMA
2. Fig. S2 The optical photographs of water droplets on the superhydrophobic PMMA-*r*-PHPA-*g*-PDFMA fibrous films during the compression–relaxation process.
3. Fig. S3 Histograms of mean diameters and contact angles of fibrous films prepared

under different conditions and the optical photographs of water droplets on the fibrous films during the compression–relaxation process.

4. Fig. S4 Plots of solvents versus mean diameters and contact angles and the optical photographs of water droplets on the fibrous films during the compression–relaxation process.

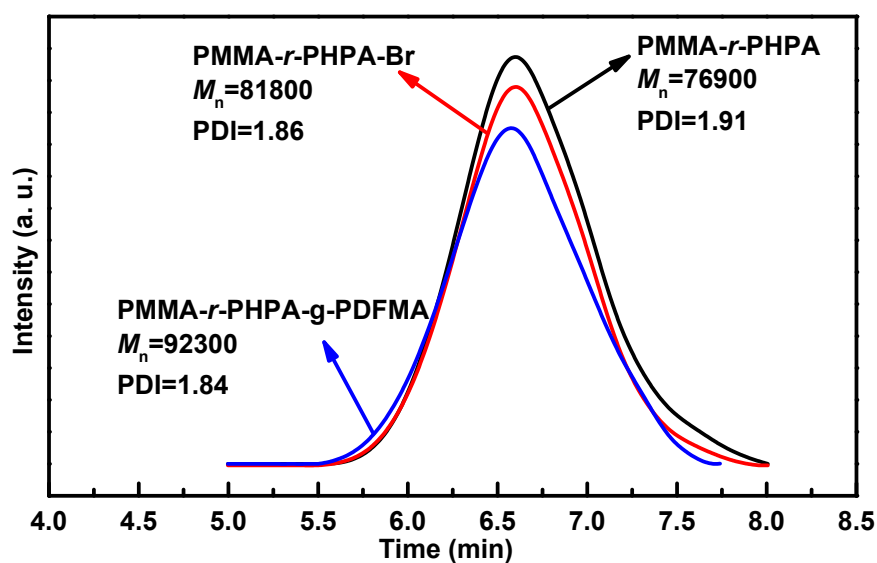

Fig. S1 GPC traces of PMMA-*r*-PHPA, PMMA-*r*-PHPA-Br and PMMA-*r*-PHPA-*g*-PDFMA

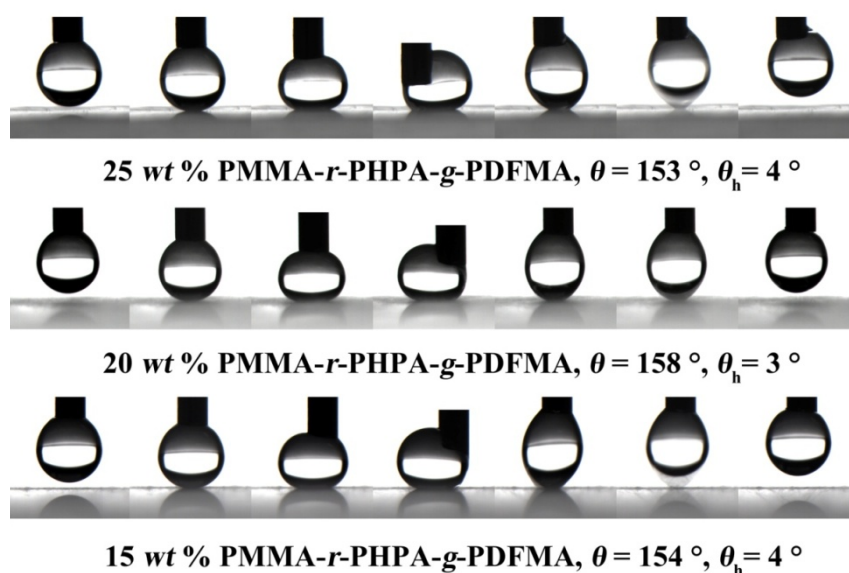

Fig. S2 The optical photographs of water droplets on the superhydrophobic PMMA-*r*-PHPA-*g*-PDFMA fibrous films during the compression–relaxation process.

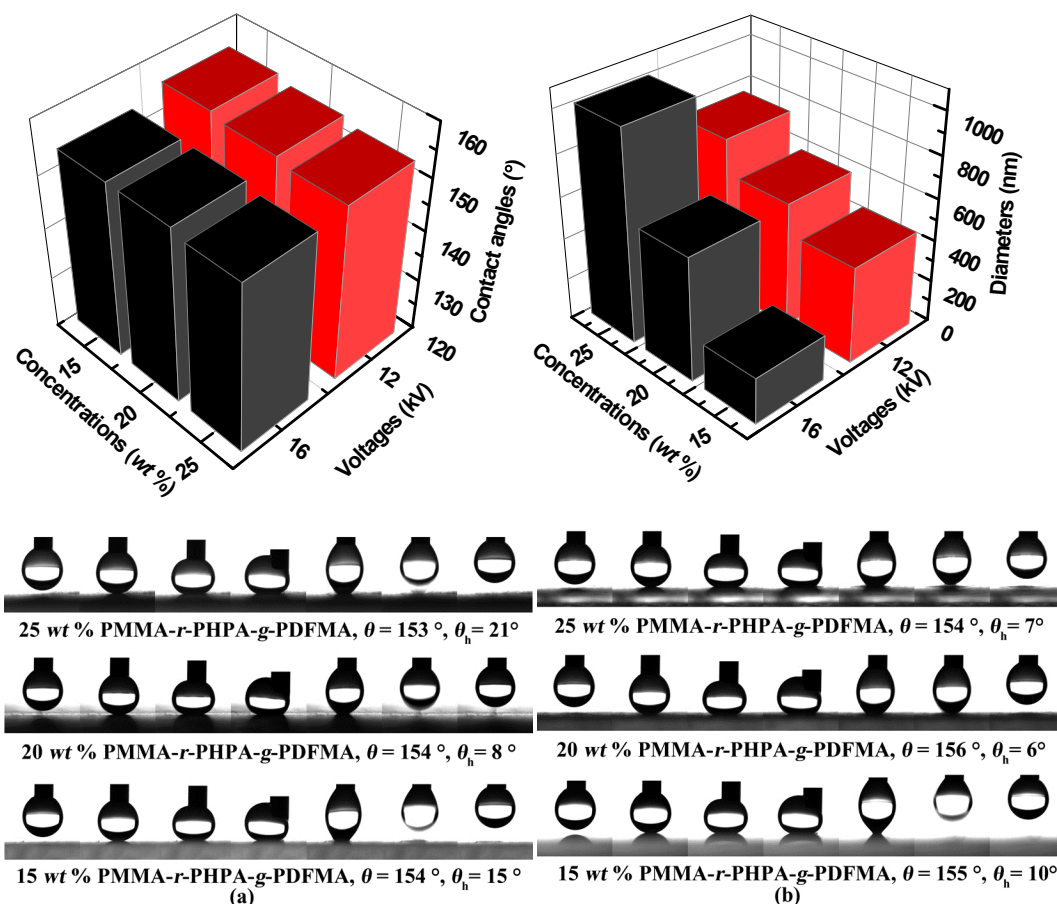

Fig. S3 Histograms of mean diameters and contact angles of fibrous films prepared under different conditions and the optical photographs of water droplets on the fibrous films during the compression–relaxation process.

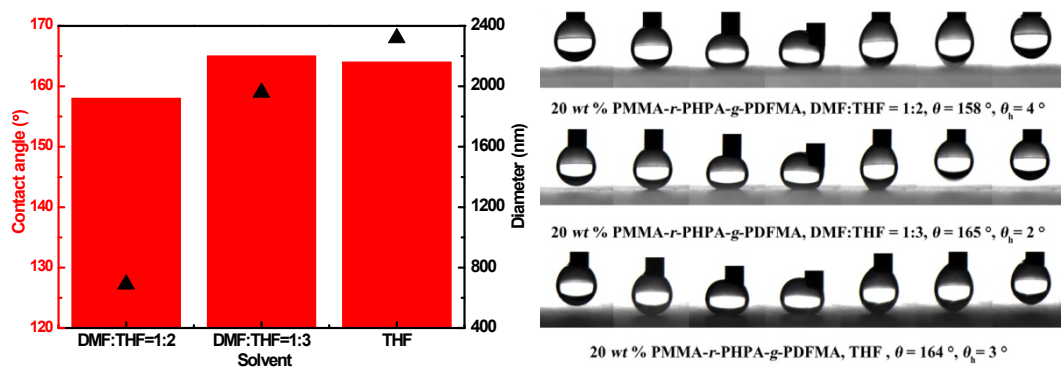

Fig. S4 Plots of solvents versus mean diameters and contact angles and the optical photographs of water droplets on the fibrous films during the compression–relaxation process.
